# Supplementary material for: Dark Proteome Database: Studies on Dark Proteins
Source: Preprints.org preprint supplement (doi:10.20944/preprints201901.0198.v1), 2019-01-21
Supplement: Supplementary file 1 [file supplementary]

## Sheet: Archaea
Non-dark	Dark	Ratio	Total	Fisher’s p value	Adjusted p value	Annotation sub-category	Annotation
168	307	36.24	475	4.47e-282	5.05e-278	SUBCELLULAR_LOCATION	Cell membrane {ECO:0000305}; Multi-pass membrane protein {ECO:0000305}.
35	93	52.7	128	4.22e-93	2.38e-89	SUBCELLULAR_LOCATION	Membrane {ECO:0000305}; Single-pass membrane protein {ECO:0000305}.
2	58	575.16	60	3.3e-74	1.24e-70	SIMILARITY	Belongs to the UPF0218 family. {ECO:0000255
0	40	0	40	1.43e-53	4.04e-50	SIMILARITY	Belongs to the archaeal flagellin family. {ECO:0000305}.
0	36	0	36	2.81e-48	6.35e-45	SIMILARITY	Belongs to the UPF0179 family. {ECO:0000255
0	33	0	33	2.61e-44	4.92e-41	FUNCTION	Flagellin is the subunit protein which polymerizes to form the filaments of archaeal flagella.
0	33	0	33	2.61e-44	4.22e-41	SUBCELLULAR_LOCATION	Archaeal flagellum.
0	32	0	32	5.5e-43	7.76e-40	COFACTOR	Name=Mg(2+); Xref=ChEBI:CHEBI:18420; Evidence={ECO:0000255|HAMAP-Rule:MF_00719};
0	32	0	32	5.5e-43	6.9e-40	SIMILARITY	Belongs to the CobS family. {ECO:0000255
0	32	0	32	5.5e-43	6.21e-40	CATALYTIC_ACTIVITY	Adenosylcobinamide-GDP + alpha-ribazole = GMP + adenosylcobalamin. {ECO:0000255|HAMAP-Rule:MF_00719}.
0	32	0	32	5.5e-43	5.65e-40	FUNCTION	Joins adenosylcobinamide-GDP and alpha-ribazole to generate adenosylcobalamin (Ado-cobalamin). Also synthesizes adenosylcobalamin 5'-phosphate from adenosylcobinamide-GDP and alpha-ribazole 5'-phosphate. {ECO:0000255|HAMAP-Rule:MF_00719}.
0	32	0	32	5.5e-43	5.17e-40	PATHWAY	Cofactor biosynthesis; adenosylcobalamin biosynthesis; adenosylcobalamin from cob(II)yrinate a,c-diamide: step 7/7. {ECO:0000255|HAMAP-Rule:MF_00719}.
0	32	0	32	5.5e-43	4.78e-40	SUBCELLULAR_LOCATION	Cell membrane {ECO:0000255|HAMAP-Rule:MF_00719}; Multi-pass membrane protein {ECO:0000255|HAMAP-Rule:MF_00719}.
2	34	337.16	36	7.13e-43	5.75e-40	SIMILARITY	Belongs to the UPF0212 family. {ECO:0000255
0	30	0	30	2.43e-40	1.83e-37	CATALYTIC_ACTIVITY	2-amino-3,7-dideoxy-D-threo-hept-6-ulosonate + H(2)O + NAD(+) = 3-dehydroquinate + NH(3) + NADH. {ECO:0000255|HAMAP-Rule:MF_01244}.
0	30	0	30	2.43e-40	1.71e-37	FUNCTION	Catalyzes the oxidative deamination and cyclization of 2-amino-3,7-dideoxy-D-threo-hept-6-ulosonic acid (ADH) to yield 3-dehydroquinate (DHQ), which is fed into the canonical shikimic pathway of aromatic amino acid biosynthesis. {ECO:0000255|HAMAP-Rule:MF_01244}.
0	28	0	28	1.07e-37	7.11e-35	SIMILARITY	Belongs to the UPF0248 family. {ECO:0000255
0	27	0	27	2.25e-36	1.41e-33	SIMILARITY	Belongs to the archaeal-type DHQ synthase family. {ECO:0000255
2	28	277.66	30	4.24e-35	2.52e-32	CATALYTIC_ACTIVITY	5-methyl-5,6,7,8-tetrahydromethanopterin + 2-mercaptoethanesulfonate = 5,6,7,8-tetrahydromethanopterin + 2-(methylthio)ethanesulfonate.
2	28	277.66	30	4.24e-35	2.39e-32	PATHWAY	One-carbon metabolism; methanogenesis from CO(2); methyl-coenzyme M from 5,10-methylene-5,6,7,8-tetrahydromethanopterin: step 2/2.

## Sheet: Bacteria
Non-dark	Dark	Ratio	Total	Fisher’s p value	Adjusted p value	Annotation sub-category	Annotation
0	391	0	391	0	0	FUNCTION	This protein specifically catalyzes the removal of signal peptides from prolipoproteins. {ECO:0000255|HAMAP-Rule:MF_00161}.
0	489	0	489	0	0	SIMILARITY	Belongs to the UPF0161 family. {ECO:0000255
2	329	3462	331	0	0	SUBCELLULAR_LOCATION	Cytoplasm {ECO:0000255|HAMAP-Rule:MF_00255}.
17	585	724.22	602	0	0	SIMILARITY	Belongs to the NrdR family. {ECO:0000255|HAMAP-Rule:MF_00440}.
2	329	3462.01	331	0	0	SUBUNIT	Tetramer of two alpha and two beta subunits. {ECO:0000255|HAMAP-Rule:MF_00255}.
0	500	0	500	0	0	PATHWAY	Lipid metabolism; phospholipid metabolism. {ECO:0000255|HAMAP-Rule:MF_01043}.
17	608	752.69	625	0	0	FUNCTION	Negatively regulates transcription of bacterial ribonucleotide reductase nrd genes and operons by binding to NrdR-boxes. {ECO:0000255|HAMAP-Rule:MF_00440}.
0	590	0	590	0	0	SIMILARITY	Belongs to the UppP family. {ECO:0000255
1	617	12985.2	618	0	0	MISCELLANEOUS	Bacitracin is thought to be involved in the inhibition of peptidoglycan synthesis by sequestering undecaprenyl diphosphate, thereby reducing the pool of lipid carrier available.
0	500	0	500	0	0	SUBUNIT	Probably interacts with PlsX. {ECO:0000255|HAMAP-Rule:MF_01043}.
0	278	0	278	0	0	SUBCELLULAR_LOCATION	Cell inner membrane {ECO:0000255|HAMAP-Rule:MF_00161}; Multi-pass membrane protein {ECO:0000255|HAMAP-Rule:MF_00161}.
0	350	0	350	0	0	SUBCELLULAR_LOCATION	Cell inner membrane {ECO:0000255|HAMAP-Rule:MF_01043}; Multi-pass membrane protein {ECO:0000255|HAMAP-Rule:MF_01043}.
0	459	0	459	0	0	FUNCTION	Catalyzes the transfer of an acyl group from acyl-phosphate (acyl-PO(4)) to glycerol-3-phosphate (G3P) to form lysophosphatidic acid (LPA). This enzyme utilizes acyl-phosphate as fatty acyl donor, but not acyl-CoA or acyl-ACP. {ECO:0000255|HAMAP-Rule:MF_01043}.
0	409	0	409	0	0	SIMILARITY	Belongs to the XseA family. {ECO:0000255
8	263	691.88	271	0	0	SIMILARITY	Belongs to the UPF0178 family. {ECO:0000255
2	329	3462.01	331	0	0	CATALYTIC_ACTIVITY	ATP + glycine + tRNA(Gly) = AMP + diphosphate + glycyl-tRNA(Gly). {ECO:0000255|HAMAP-Rule:MF_00255}.
0	419	0	419	0	0	FUNCTION	Bidirectionally degrades single-stranded DNA into large acid-insoluble oligonucleotides, which are then degraded further into small acid-soluble oligonucleotides. {ECO:0000255|HAMAP-Rule:MF_00378}.
17	609	753.93	626	0	0	COFACTOR	Name=Zn(2+); Xref=ChEBI:CHEBI:29105; Evidence={ECO:0000255|HAMAP-Rule:MF_00440}; Note=Binds 1 zinc ion. {ECO:0000255|HAMAP-Rule:MF_00440};
0	419	0	419	0	0	SUBUNIT	Heterooligomer composed of large and small subunits. {ECO:0000255|HAMAP-Rule:MF_00378}.
0	459	0	459	0	0	CATALYTIC_ACTIVITY	Acyl-phosphate + sn-glycerol 3-phosphate = 1-acyl-sn-glycerol 3-phosphate + phosphate. {ECO:0000255|HAMAP-Rule:MF_01043}.

## Sheet: Eukaryota
Non-dark	Dark	Ratio	Total	Fisher’s p value	Adjusted p value	Annotation sub-category	Annotation
1	380	2397.28	381	0	0	SIMILARITY	Belongs to the Casparian strip membrane proteins (CASP) family. {ECO:0000305}.
1722	1900	6.96	3622	0	0	SUBCELLULAR_LOCATION	Membrane {ECO:0000305}; Multi-pass membrane protein {ECO:0000305}.
182	744	25.79	926	0	0	TISSUE_SPECIFICITY	Expressed by the venom duct.
1	376	2372.04	377	2.96e-323	2.31e-318	SUBUNIT	Homodimer and heterodimers. {ECO:0000250}.
966	900	5.878	1866	2.94e-281	1.84e-276	SUBCELLULAR_LOCATION	Membrane {ECO:0000305}; Single-pass membrane protein {ECO:0000305}.
14	276	124.37	290	9.18e-217	4.77e-212	DOMAIN	The presence of a 'disulfide through disulfide knot' structurally defines this protein as a knottin. {ECO:0000250}.
448	557	7.84	1005	1.8e-212	8.02e-208	SUBCELLULAR_LOCATION	Cell membrane {ECO:0000250}; Multi-pass membrane protein {ECO:0000250}.
39	250	40.44	289	9.16e-171	3.57e-166	TISSUE_SPECIFICITY	Testis.
0	196	0	196	4.22e-170	1.46e-165	SIMILARITY	Belongs to the PsbN family. {ECO:0000255|HAMAP-Rule:MF_00293}.
0	194	0	194	2.26e-168	7.06e-164	FUNCTION	May play a role in photosystem I and II biogenesis. {ECO:0000255|HAMAP-Rule:MF_00293}.
0	189	0	189	4.75e-164	1.35e-159	SUBCELLULAR_LOCATION	Plastid, chloroplast thylakoid membrane {ECO:0000255|HAMAP-Rule:MF_00293}; Single-pass membrane protein {ECO:0000255|HAMAP-Rule:MF_00293}.
412	456	6.98	868	6.67e-162	1.73e-157	SUBCELLULAR_LOCATION	Endoplasmic reticulum membrane {ECO:0000250}; Multi-pass membrane protein {ECO:0000250}.
0	184	0	184	9.98e-160	2.39e-155	CAUTION	Originally thought to be a component of PSII; based on experiments in Synechocystis, N.tabacum and barley, and its absence from PSII in T.elongatus and T.vulcanus, this is probably not true. {ECO:0000255
26	217	52.65	243	4.35e-155	9.69e-151	SIMILARITY	Belongs to the conotoxin O1 superfamily. {ECO:0000305}.
87	258	18.71	345	6.35e-146	1.32e-141	SIMILARITY	Belongs to the DEFL family. {ECO:0000305}.
1	155	977.84	156	1.57e-132	3.06e-128	SIMILARITY	Belongs to the protamine P1 family. {ECO:0000305}.
0	145	0	145	5.12e-126	9.4e-122	FUNCTION	Mitochondrial membrane ATP synthase (F(1)F(0) ATP synthase or Complex V) produces ATP from ADP in the presence of a proton gradient across the membrane which is generated by electron transport complexes of the respiratory chain. F-type ATPases consist of two structural domains, F(1) - containing the extramembraneous catalytic core and F(0) - containing the membrane proton channel, linked together…
0	143	0	143	2.74e-124	4.75e-120	SUBCELLULAR_LOCATION	Mitochondrion membrane; Single-pass membrane protein.
0	142	0	142	2.01e-123	3.29e-119	SIMILARITY	Belongs to the ATPase protein 8 family. {ECO:0000305}.
2313	18	0.05	2331	3.33e-119	5.2e-115	CATALYTIC_ACTIVITY	ATP + a protein = ADP + a phosphoprotein.

## Sheet: Virus
Non-dark	Dark	Ratio	Total	Fisher’s p value	Adjusted p value	Annotation sub-category	Annotation
52	298	14.61	350	3.95e-110	5.71e-106	SUBCELLULAR_LOCATION	Host membrane {ECO:0000305}; Single-pass membrane protein {ECO:0000305}.
58	185	8.13	243	3.11e-54	2.25e-50	SUBCELLULAR_LOCATION	Host membrane {ECO:0000305}; Multi-pass membrane protein {ECO:0000305}.
0	84	0	84	5.36e-47	2.58e-43	SIMILARITY	Belongs to the papillomaviridae L2 protein family. {ECO:0000305}.
39	147	9.61	186	5.77e-47	2.08e-43	SUBCELLULAR_LOCATION	Membrane {ECO:0000305}; Single-pass membrane protein {ECO:0000305}.
0	83	0	83	1.91e-46	5.52e-43	PTM	Highly phosphorylated. {ECO:0000305}.
0	82	0	82	6.8e-46	1.64e-42	SUBUNIT	Interacts with major capsid protein L1. Interacts with host importins. {ECO:0000250}.
0	82	0	82	6.8e-46	1.4e-42	FUNCTION	Minor protein of the capsid that localizes along the inner surface of the virion, within the central cavities beneath the L1 pentamers. Plays a role in capsid stabilization through interaction with the major capsid protein L1. Once the virion enters the host cell, escorts the genomic DNA into the nucleus, in particular by promoting virion endosomal escape. It is involved, through its interaction …
47	152	8.24	199	3.91e-45	7.07e-42	FUNCTION	Plays a role in virus cell tropism, and may be required for efficient virus replication in macrophages. {ECO:0000250}.
7	83	30.22	90	1.47e-37	2.35e-34	SUBCELLULAR_LOCATION	Cell membrane {ECO:0000305}; Multi-pass membrane protein {ECO:0000305}.
306	6	0.05	312	1.11e-35	1.6e-32	CATALYTIC_ACTIVITY	Nucleoside triphosphate + RNA(n) = diphosphate + RNA(n+1). {ECO:0000255|PROSITE-ProRule:PRU00539}.
0	57	0	57	4.13e-32	5.42e-29	SIMILARITY	Belongs to the asfivirus MGF 360 family. {ECO:0000305}.
38	110	7.38	148	3.14e-31	3.78e-28	SUBCELLULAR_LOCATION	Membrane {ECO:0000305}; Multi-pass membrane protein {ECO:0000305}.
209	0	0	209	1.04e-30	1.16e-27	SIMILARITY	Belongs to the influenza viruses hemagglutinin family. {ECO:0000305}.
207	0	0	207	2.94e-30	3.03e-27	PTM	In natural infection, inactive HA is matured into HA1 and HA2 outside the cell by one or more trypsin-like, arginine-specific endoprotease secreted by the bronchial epithelial cells. One identified protease that may be involved in this process is secreted in lungs by Clara cells (By similarity). {ECO:0000250}.
0	53	0	53	6.61e-30	6.36e-27	SUBUNIT	Homomultimer. Interacts with envelope E protein in the budding compartment of the host cell, which is located between endoplasmic reticulum and the Golgi complex. Forms a complex with HE and S proteins. Interacts with nucleocapsid N protein. This interaction probably participates in RNA packaging into the virus (By similarity). {ECO:0000250}.
0	51	0	51	8.36e-29	7.54e-26	SIMILARITY	Belongs to the asfivirus MGF 110 family. {ECO:0000305}.
1	52	132.55	53	9.02e-28	7.66e-25	SIMILARITY	Belongs to the coronaviruses M protein family. {ECO:0000305}.
1	50	127.45	51	1.1e-26	8.81e-24	FUNCTION	Component of the viral envelope that plays a central role in virus morphogenesis and assembly via its interactions with other viral proteins. {ECO:0000250}.
182	0	0	182	1.4e-26	1.06e-23	CATALYTIC_ACTIVITY	Hydrolysis of alpha-(2->3)-, alpha-(2->6)-, alpha-(2->8)- glycosidic linkages of terminal sialic acid residues in oligosaccharides, glycoproteins, glycolipids, colominic acid and synthetic substrates.
7	61	22.21	68	2.59e-26	1.87e-23	PTM	Phosphorylated. {ECO:0000250}.

## Sheet: Arabidopsis
Non-dark	Dark	Ratio	Total	Fisher’s p value	Adjusted p value	Annotation sub-category	Annotation
205	141	8.2	346	5.09e-65	1.43e-60	SUBCELLULAR_LOCATION	Secreted (By similarity).
84	101	14.34	185	3.73e-62	5.25e-58	SIMILARITY	Belongs to the DEFL family.
0	38	0	38	5.05e-43	4.74e-39	SIMILARITY	Belongs to the PC-esterase family. TBL subfamily.
0	36	0	36	8.56e-41	6.03e-37	MISCELLANEOUS	Contains 2 motifs that are conserved in esterases, but it is unlikely that this protein belongs to the catalytically active pectin esterases (PubMed:20657172).
0	34	0	34	1.45e-38	8.17e-35	SIMILARITY	Belongs to the plant rapid alkalinization factor (RALF) family.
0	32	0	32	2.46e-36	1.153e-32	FUNCTION	Cell signaling peptide that may regulate plant stress, growth, and development. Mediates a rapid alkalinization of extracellular space by mediating a transient increase in the cytoplasmic Ca(2+) concentration leading to a calcium-dependent signaling events through a cell surface receptor and a concomitant activation of some intracellular mitogen-activated protein kinases (By similarity).
0	31	0	31	3.19e-35	1.29e-31	FUNCTION	May be involved in the specific O-acetylation of cell wall polymers (By similarity).
0	30	0	30	4.15e-34	1.46e-30	SIMILARITY	Belongs to the CLV3/ESR signal peptide family.
0	29	0	29	5.4e-33	1.69e-29	SIMILARITY	Belongs to the LOB domain-containing protein family.
7	33	56.22	40	2.05e-30	5.76e-27	SUBCELLULAR_LOCATION	Membrane; Single-pass type II membrane protein (Potential).
12	34	33.79	46	2.23e-28	5.7e-25	CAUTION	Lacks 1 of the 4 disulfide bonds, which are conserved features of the family.
2	27	160.99	29	3.18e-28	7.45e-25	SUBCELLULAR_LOCATION	Secreted, extracellular space (By similarity).
0	23	0	23	2.6e-26	5.63e-23	SIMILARITY	Belongs to the Casparian strip membrane proteins (CASP) family.
0	23	0	23	2.6e-26	5.23e-23	SIMILARITY	Contains 1 Dof-type zinc finger.
0	20	0	20	5.68e-23	1.07e-19	SUBUNIT	Homodimer and heterodimers (By similarity).
9	25	33.13	34	4.05e-21	7.12e-18	SUBCELLULAR_LOCATION	Secreted, cell wall.
0	18	0	18	9.56e-21	1.58e-17	FUNCTION	Extracellular signal peptide that regulates cell fate. Represses root apical meristem maintenance.
0	18	0	18	9.56e-21	1.5e-17	SIMILARITY	Belongs to the GRAS family.
11	25	27.11	36	3.97e-20	5.89e-17	SUBCELLULAR_LOCATION	Endoplasmic reticulum membrane; Multi-pass membrane protein (By similarity).
0	17	0	17	1.24e-19	1.75e-16	FUNCTION	Transcription factor that binds specifically to a 5'-AA[AG]G-3' consensus core sequence (By similarity).

## Sheet: C. Elegans
Non-dark	Dark	Ratio	Total	Fisher’s p value	Adjusted p value	Annotation sub-category	Annotation
0	16	0	16	4.99e-20	3.57e-16	SIMILARITY	Belongs to the pannexin family.
110	42	5.7	152	8.33e-17	2.98e-13	SUBCELLULAR_LOCATION	Membrane; Multi-pass membrane protein (Potential).
38	26	10.21	64	2.21e-15	5.28e-12	SUBCELLULAR_LOCATION	Membrane; Single-pass membrane protein (Potential).
0	10	0	10	8.98e-13	1.61e-09	FUNCTION	Structural components of the gap junctions (By similarity).
0	10	0	10	8.98e-13	1.29e-09	SIMILARITY	Belongs to the FARP (FMRFamide related peptide) family.
0	10	0	10	8.99e-13	1.07e-09	SIMILARITY	Belongs to the bestrophin family.
0	10	0	10	8.99e-13	9.19e-10	SUBCELLULAR_LOCATION	Cell membrane; Multi-pass membrane protein (Potential). Cell junction, gap junction (By similarity).
0	8	0	8	2.33e-10	2.09e-07	SIMILARITY	Belongs to the UPF0392 family.
0	7	0	7	3.74e-09	2.98e-06	TISSUE_SPECIFICITY	Each flp gene is expressed in a distinct set of neurons.
0	7	0	7	3.75e-09	2.68e-06	SIMILARITY	Contains 1 F-box domain.
12	12	14.92	24	4.61e-09	3e-06	SUBCELLULAR_LOCATION	Secreted.
0	5	0	5	9.64e-07	0	SUBCELLULAR_LOCATION	Cell membrane; Multi-pass membrane protein (Potential).Cell junction, gap junction.
0	5	0	5	9.64e-07	0	SIMILARITY	Belongs to the YARP (YGGW-amide related peptide) family.
0	4	0	4	1.54e-05	0.01	SUBUNIT	Complex I is composed of 45 different subunits (By similarity).
0	4	0	4	1.54e-05	0.01	FUNCTION	FMRFamides and FMRFamide-like peptides are neuropeptides.
0	4	0	4	1.54e-05	0.01	SIMILARITY	Belongs to the HRG family.

## Sheet: E. Coli
Non-dark	Dark	Ratio	Total	Fisher’s p value	Adjusted p value	Annotation sub-category	Annotation
0	9	0	9	4.89e-08	4.9e-05	FUNCTION	Lysis proteins are required for both colicin release and partial cell lysis.
0	8	0	8	3.2107	0	SUBCELLULAR_LOCATION	Cell outer membrane; Lipid-anchor (Potential).
0	6	0	6	1.37e-05	0	SUBCELLULAR_LOCATION	Cell inner membrane; Multi-pass membrane protein. Secreted (By similarity). Note=Propilin is directed to the inner membrane, where it is cleaved and acetylated. Mature pilin forms filaments that are secreted to form the conjugative pilus (By similarity).
0	6	0	6	1.38e-05	0	SIMILARITY	Belongs to the TraA family.
0	6	0	6	1.38e-05	0	FUNCTION	Propilin is the precursor of the pilus subunit, pilin, that forms conjugative pili, the filamentous surface appendages required for cell-to-cell contact during the earlier stages of bacterial conjugation, and that retract after contact is established. Mature pilin is assembled with the help of TraQ and TraX (By similarity).
0	6	0	6	1.38e-05	0	SUBUNIT	Monomer. Interacts with itself to form filaments; also interacts with TraQ (By similarity).
0	5	0	5	8.94e-05	0	FUNCTION	Conjugative DNA transfer (CDT) is the unidirectional transfer of ssDNA plasmid from a donor to a recipient cell. It is the central mechanism by which antibiotic resistance and virulence factors are propagated in bacterial populations. Part of the relaxosome, which facilitates a site- and strand-specific cut in the origin of transfer by TraI, at the nic site. Relaxosome formation requires binding …
0	5	0	5	8.94e-05	0.01	SUBUNIT	Part of the relaxosome, a complex composed of plasmid encoded TraI, TraM, TraY and host-encoded IHF bound to the F plasmid origin of transfer (oriT). Interacts with TraM, probably through its C-terminus (By similarity).
0	5	0	5	8.94e-05	0.01	SIMILARITY	Belongs to the TraY family.
0	5	0	5	8.94e-05	0.01	SIMILARITY	Belongs to the transposase 7 family.

## Sheet: Mouse
Non-dark	Dark	Ratio	Total	Fisher’s p value	Adjusted p value	Annotation sub-category	Annotation
207	158	10.35	365	1.61e-84	9.03e-80	SUBCELLULAR_LOCATION	Membrane; Multi-pass membrane protein (Potential).
100	60	8.13	160	7.35e-29	2.06e-24	SUBCELLULAR_LOCATION	Membrane; Single-pass membrane protein (Potential).
0	15	0	15	3.52e-18	6.56e-14	FUNCTION	In the hair cortex, hair keratin intermediate filaments are embedded in an interfilamentous matrix, consisting of hair keratin-associated proteins (KRTAP), which are essential for the formation of a rigid and resistant hair shaft through their extensive disulfide bond cross-linking with abundant cysteine residues of hair keratins. The matrix proteins include the high-sulfur and high-glycine-tyros…
0	14	0	14	5.14e-17	7.18e-13	SIMILARITY	Belongs to the DHHC palmitoyltransferase family.
2	15	101.67	17	4.2e-16	4.69e-12	CATALYTIC_ACTIVITY	Palmitoyl-CoA + [protein]-L-cysteine = [protein]-S-palmitoyl-L-cysteine + CoA.
3	14	63.26	17	2.88e-14	2.67e-10	SUBUNIT	Complex I is composed of 45 different subunits (By similarity).
5	15	40.67	20	3.92e-14	3.13e-10	FUNCTION	Accessory subunit of the mitochondrial membrane respiratory chain NADH dehydrogenase (Complex I), that is believed not to be involved in catalysis. Complex I functions in the transfer of electrons from NADH to the respiratory chain. The immediate electron acceptor for the enzyme is believed to be ubiquinone (By similarity).
53	29	7.42	82	5.91e-14	4.13e-10	SUBCELLULAR_LOCATION	Endoplasmic reticulum membrane; Multi-pass membrane protein (By similarity).
2	13	88.11	15	6.9e-14	4.29e-10	DOMAIN	The DHHC domain is required for palmitoyltransferase activity (By similarity).
0	9	0	9	3.39e-11	1.9e-07	SIMILARITY	Belongs to the EMP24/GP25L family.
0	9	0	9	3.39e-11	1.73e-07	SIMILARITY	Belongs to the chemokine-like factor family.
331	0	0	331	1.07e-10	4.96e-07	CATALYTIC_ACTIVITY	ATP + a protein = ADP + a phosphoprotein.
1	9	122	10	3.18e-10	1.37e-06	SUBUNIT	Interacts with hair keratins (By similarity).
0	8	0	8	4.94e-10	1.97e-06	INDUCTION	Expression in skin and hair follicle is regulated by HOXC13 and by GATA3.
0	8	0	8	4.94e-10	1.84e-06	SIMILARITY	Belongs to the anoctamin family.
0	8	0	8	4.94e-10	1.72e-06	MISCELLANEOUS	The term 'anoctamin' was coined because these channels are anion selective and have eight (OCT) transmembrane segments. There is some dissatisfaction in the field with the Ano nomenclature because it is not certain that all the members of this family are anion channels or have the 8-transmembrane topology.
2	9	60.99	11	1.64e-09	5.39e-06	SUBCELLULAR_LOCATION	Endoplasmic reticulum membrane; Multi-pass membrane protein (Potential).
331	1	0.04	332	2.66e-09	8.24e-06	SIMILARITY	Belongs to the G-protein coupled receptor 1 family.
0	7	0	7	7.2e-09	2.12e-05	SIMILARITY	Belongs to the ADIPOR family.
0	7	0	7	7.2e-09	2.01e-05	TISSUE_SPECIFICITY	Strong expression in narrowly defined pattern restricted to the lower and middle cortical regions of the hair shaft in both developing and cycling hair. During hair follicle regression (catagen), expression levels decrease until expression is no longer detectable in follicles at resting stage (telogen).

## Sheet: Human
Non-dark	Dark	Ratio	Total	Fisher’s p value	Adjusted p value	Annotation sub-category	Annotation
124	28	18.49	152	9.71e-25	6.65e-20	SUBCELLULAR_LOCATION	Membrane; Single-pass membrane protein (Potential).
0	11	0	11	7.55e-22	2.59e-17	CAUTION	Product of a dubious CDS prediction. May be a non-coding RNA.
162	27	13.64	189	7.11e-21	1.62e-16	CAUTION	Could be the product of a pseudogene.
5	12	196.47	17	5.29e-20	9.05e-16	CAUTION	Product of a dubious CDS prediction.
0	9	0	9	5.27e-18	7.22e-14	MISCELLANEOUS	Encoded by one of the numerous copies of NBPF genes clustered in the p36, p12 and q21 region of the chromosome 1.
0	9	0	9	5.27e-18	6.01e-14	SIMILARITY	Belongs to the beta type-B retroviral envelope protein family. HERV class-II K(HML-2) env subfamily.
0	8	0	8	4.39e-16	4.3e-12	FUNCTION	Retroviral replication requires the nuclear export and translation of unspliced, singly-spliced and multiply-spliced derivatives of the initial genomic transcript. Rec interacts with a highly structured RNA element (RcRE) present in the viral 3'LTR and recruits the cellular nuclear export machinery. This permits export to the cytoplasm of unspliced genomic or incompletely spliced subgenomic viral…
0	8	0	8	4.39e-16	3.76e-12	SUBUNIT	Forms homodimers, homotrimers, and homotetramers via a C-terminal domain. Associates with XPO1 and with ZNF145 (By similarity).
1	8	654.91	9	3.91e-15	2.98e-11	PTM	Specific enzymatic cleavages in vivo yield the mature SU and TM proteins (By similarity).
0	7	0	7	3.66e-14	2.51e-10	SUBCELLULAR_LOCATION	Cytoplasm (By similarity). Nucleus, nucleolus (By similarity). Note=Shuttles
							between the nucleus and the cytoplasm. When in the nucleus, resides in the nucleolus (By similarity).
3	8	218.3	11	7.02e-14	4.37e-10	SUBUNIT	The surface (SU) and transmembrane (TM) proteins form a heterodimer. SU and TM are attached by noncovalent interactions or by a labile interchain disulfide bond (By similarity).
218	21	7.89	239	2.55e-12	1.46e-08	SUBCELLULAR_LOCATION	Membrane; Multi-pass membrane protein (Potential).
0	5	0	5	2.54e-10	1.34e-06	MISCELLANEOUS	The ancestral BAGE gene was generated by juxtacentromeric reshuffling of the KMT2C/MLL3 gene. The BAGE family was expanded by juxtacentromeric movement and/or acrocentric exchanges. BAGE family is composed of expressed genes that map to the juxtacentromeric regions of chromosomes 13 and 21 and of unexpressed gene fragments that scattered in the juxtacentromeric regions of several chromosomes, inc…
0	5	0	5	2.54e-10	1.24e-06	SIMILARITY	Belongs to the BAGE family.
0	5	0	5	2.54e-10	1.16e-06	CAUTION	Product of a dubious CDS prediction. Probable non-coding RNA.
215	17	6.47	232	4.87e-09	2.09e-05	SUBCELLULAR_LOCATION	Secreted (Potential).
2	5	204.66	7	5.22e-09	2.1e-05	FUNCTION	Retroviral envelope proteins mediate receptor recognition and membrane fusion during early infection. Endogenous envelope proteins may have kept, lost or modified their original function during evolution. This endogenous envelope protein has lost its original fusogenic properties.
3	5	136.44	8	1.38e-08	5.25e-05	SUBUNIT	Complex I is composed of 45 different subunits.
0	4	0	4	2.11e-08	7.61e-05	CAUTION	No predictable signal peptide.
0	4	0	4	2.11e-08	7.23e-05	SIMILARITY	Belongs to the Speedy/Ringo family.
