# Supplementary material for: Dark Proteome Database: Studies on Dark Proteins
Source: Preprints.org preprint supplement (doi:10.20944/preprints201901.0198.v1), 2019-01-21
Supplement: Supplementary file 4 [file DatasetS2.xlsx]

## Sheet: Archaea
Non-dark	Dark	Ratio	Total	Fisher’s p value	Adjusted p value	Annotation sub-category	Annotation
2915	1489	14.56	4404	0	0	transmem	Helical; (Potential)
9748	0	0	9748	2.53e-154	2.83e-150	helix
9630	0	0	9630	2.41e-152	1.8e-148	strand
3337	0	0	3337	2.85e-51	1.6e-47	binding	Substrate (By similarity)
2762	0	0	2762	2.08e-42	9.33e-39	metal	Zinc (By similarity)
61	49	22.9	110	4.52e-42	1.69e-38	signal	Potential
2081	0	0	2081	6.71e-32	2.15e-28	turn
2024	0	0	2024	4.73e-31	1.32e-27	binding	ATP (By similarity)
0	19	0	19	1.12e-28	2.8e-25	binding	5\'-hydroxybenzimidazolyl-cobamide cofactor (By similarity).
0	16	0	16	2.93e-24	6.56e-21	carbohyd	O-linked (Gal...) (By similarity)
0	16	0	16	2.93e-24	5.96e-21	carbohyd	O-linked (Gal...) (Probable)
1538	0	0	1538	9.49e-24	1.77e-20	np_bind	ATP (By similarity)
4	18	128.27	22	2.14e-23	3.69e-20	carbohyd	N-linked (GlcNAc...)
1475	0	0	1475	1e-22	1.6e-19	act_site	By similarity
1336	0	0	1336	1.72e-20	2.57e-17	region	Substrate binding (By similarity)
1141	0	0	1141	1.17e-17	1.64e-14	metal	Magnesium (By similarity)
1111	0	0	1111	3.9e-17	5.14e-14	np_bind	GTP (By similarity)
0	10	0	10	1.97e-15	2.46e-12	carbohyd	N-linked (Glc...) (By similarity)
112	26	6.62	138	1.21e-12	1.43e-09	topo_dom	Cytoplasmic (Potential)
0	8	0	8	1.73e-12	1.93e-09	carbohyd	N-linked (Glc...) (Probable)

## Sheet: Bacteria
Non-dark	Dark	Ratio	Total	Fisher’s p value	Adjusted p value	Annotation sub-category	Annotation
71755	157	0.04	71912	0	0	binding	Substrate (By similarity)
15840	2	0	15842	0	0	act_site	Proton acceptor (By similarity)
106025	45526	8.65	151551	0	0	transmem	Helical; (Potential)
32419	1	0	32420	0	0	region	Substrate binding (By similarity)
25822	0	0	25822	0	0	np_bind	ATP (By similarity)
23258	0	0	23258	0	0	binding	ATP (By similarity)
16652	0	0	16652	0	0	turn
74996	0	0	74996	0	0	strand
29552	0	0	29552	0	0	metal	Magnesium (By similarity)
20979	0	0	20979	0	0	np_bind	GTP (By similarity)
75097	0	0	75097	0	0	helix
29578	0	0	29578	0	0	metal	Zinc (By similarity)
5667	1119	3.98	6786	6.8e-287	1.9e-282	signal	Potential
1326	554	8.41	1880	6.08e-270	1.58e-265	non_ter
14342	18	0.03	14360	1.71e-268	4.13e-264	binding	S-adenosyl-L-methionine (By similarity)
6610	1173	3.57	7783	8.75e-265	1.99e-260	topo_dom	Periplasmic (Potential)
630	416	13.29	1046	7.67e-262	1.64e-257	metal	Iron 1 (By similarity)
634	416	13.21	1050	4.78e-261	9.64e-257	metal	Iron 2 (By similarity)
9096	1388	3.072	10484	1.46e-255	2.79e-251	topo_dom	Cytoplasmic (Potential)
11421	0	0	11421	1.21e-241	2.2e-237	binding	NAD (By similarity)

## Sheet: Eukaryota
Non-dark	Dark	Ratio	Total	Fisher’s p value	Adjusted p value	Annotation sub-category	Annotation
96211	24496	3.25	120707	0	0	transmem	Helical; (Potential)
15723	3753	3.05	19476	0	0	signal	Potential
45	562	159.48	607	0	0	mod_res	Phenylalanine amide
4152	1677	5.16	5829	0	0	topo_dom	Lumenal (Potential)
69	524	96.98	593	0	0	mod_res	Leucine amide
35139	6509	2.37	41648	0	0	topo_dom	Cytoplasmic (Potential)
16045	11	0.01	16056	0	0	binding	Substrate (By similarity)
6648	3000	5.76	9648	0	0	non_ter
10317	2823	3.49	13140	0	0	coiled	Potential
110128	0	0	110128	0	0	strand
27108	0	0	27108	0	0	turn
103913	0	0	103913	0	0	helix
44	312	90.55	356	5.19e-301	1.79e-296	mod_res	Valine amide
8891	1	0	8892	1.69e-289	5.43e-285	np_bind	ATP (By similarity)
24535	3794	1.97	28329	2.95e-287	8.82e-283	mod_res	Phosphoserine (By similarity)
904	596	8.42	1500	1.95e-273	5.46e-269	unsure	L or I
8122	2	0	8124	8.37e-262	2.21e-257	act_site	Proton acceptor (By similarity)
1186	641	6.9	1827	1.49e-257	3.7e-253	non_cons
401	414	13.18	815	8.24e-242	1.94e-237	mod_res	Pyrrolidone carboxylic acid
6967	0	0	6967	5.48e-229	1.23e-224	np_bind	GTP (By similarity)

## Sheet: Viruses
Non-dark	Dark	Ratio	Total	Fisher’s p value	Adjusted p value	Annotation sub-category	Annotation
7998	0	0	7998	0	0	helix
11536	0	0	11536	0	0	strand
4352	2148	2.81442	6500	0	3.31e-305	transmem	Helical; (Potential)
4680	120	0.146211	4800	5.25e-190	4.59e-186	disulfid	By similarity
2079	0	0	2079	1.2e-147	8.42e-144	turn
654	514	4.48156	1168	2.84e-126	1.66e-122	topo_dom	Virion surface (Potential)
647	443	3.9043	1090	8.45e-95	4.22e-91	topo_dom	Intravirion (Potential)
0	99	0	99	1.32e-82	5.76e-79	carbohyd	O-linked (GalNAc...); by host (By similarity).
893	8	0.0510837	901	7.68e-51	2.98e-47	lipid	S-palmitoyl cysteine; by host (By similarity).
905	396	2.49512	1301	5.12e-46	1.79e-42	signal	Potential
44	82	10.6269	126	2.69e-37	8.56e-34	compbias	Arg-rich
69	92	7.60296	161	5.05e-35	1.47e-31	compbias	Poly-Glu
12260	1598	0.743242	13858	6.41e-34	1.72e-30	carbohyd	N-linked (GlcNAc...); by host (Potential).
7	49	39.9155	56	2.4e-33	6e-30	topo_dom	Intravirion; in internal conformation (Potential).
7	49	39.9155	56	2.4e-33	5.6e-30	topo_dom	Intravirion; in external conformation (Potential).
7	49	39.9155	56	2.4e-33	5.25e-30	topo_dom	Virion surface; in external conformation (Potential).
167	130	4.43885	297	9.22e-33	1.9e-29	compbias	Poly-Ser
124	112	5.15039	236	2.57e-32	4.99e-29	compbias	Poly-Ala
0	38	0	38	3.9e-32	7.18e-29	transmem	Potential
900	31	0.19641	931	2.35e-31	4.11e-28	site	Cleavage; by viral protease (By similarity).

## Sheet: Arabidopsis
Non-dark	Dark	Ratio	Total	Fisher’s p value	Adjusted p value	Annotation sub-category	Annotation
7594	1439	2.85	9033	5.47e-257	1.53e-252	transmem	Helical; (Potential)
1583	422	4.01	2005	6.64e-110	9.28e-106	disulfid	By similarity
3643	0	0	3643	4.57e-104	4.26e-100	helix
3353	0	0	3353	1.07e-95	7.47e-92	strand
2	48	360.65	50	1.36e-55	7.63e-52	mod_res	Hydroxyproline (By similarity)
0	37	0	37	2.41e-45	1.12e-41	motif	DCXHWCLPGXXDXWN motif
0	37	0	37	2.41e-45	9.61e-42	motif	GDS motif
2140	336	2.36	2476	9.84e-41	3.44e-37	topo_dom	Cytoplasmic (Potential)
1454	251	2.59	1705	2.44e-36	7.59e-33	signal	Potential
0	29	0	29	1.09e-35	3.03e-32	domain	LOB
0	27	0	27	2.81e-33	7.13e-30	carbohyd	O-linked (Ara...) (By similarity)
1065	0	0	1065	2.54e-30	5.91e-27	binding	Substrate (By similarity)
2	26	195.36	28	1.51e-29	3.24e-26	non_ter
0	23	0	23	1.88e-28	3.75e-25	zn_fing	Dof-type
0	21	0	21	4.85e-26	9.04e-23	mod_res	Sulfotyrosine (By similarity)
914	0	0	914	5.22e-26	9.12e-23	act_site	Proton acceptor (By similarity)
905	0	0	905	7.09e-26	1.17e-22	np_bind	ATP (By similarity)
896	0	0	896	1.03e-25	1.6e-22	turn
2	22	165.3	24	7.37e-25	1.08e-21	motif	Histidine box-1
2	22	165.3	24	7.37e-25	1.03e-21	motif	Histidine box-3
2	22	165.3	24	7.37e-25	9.8e-22	motif	Histidine box-2
825	0	0	825	1.19e-23	1.51e-20	binding	ATP (By similarity)
0	18	0	18	2.01e-22	2.44e-19	domain	Ovate
1395	203	2.187	1598	1.41e-21	1.64e-18	topo_dom	Extracellular (Potential)
6175	245	0.6	6420	1.4e-18	1.56e-15	carbohyd	N-linked (GlcNAc...) (Potential)
1057	10	0.14	1067	1.84e-18	1.97e-15	act_site	By similarity
639	0	0	639	2.57e-18	2.66e-15	domain	Protein kinase

## Sheet: C. Elegans
Non-dark	Dark	Ratio	Total	Fisher’s p value	Adjusted p value	Annotation sub-category	Annotation
1701	461	3.98	2162	1.43e-133	1.1e-129	transmem	Helical; (Potential)
1563	9	0.08	1572	5.21e-34	2e-30	disulfid	By similarity
920	0	0	920	3.34e-27	8.54e-24	helix
0	19	0	19	1.75e-23	3.35e-20	mod_res	Tyrosine amide (Potential)
761	0	0	761	1.49e-22	2.28e-19	strand
0	17	0	17	4.39e-21	5.61e-18	mod_res	Phenylalanine amide
319	61	2.81	380	3.51e-11	3.85e-08	signal	Potential
0	8	0	8	2.69e-10	2.58e-07	domain	DUF23
486	72	2.18	558	1.15e-08	9.81e-06	topo_dom	Cytoplasmic (Potential)
73	23	4.63	96	2.56e-08	1.96e-05	topo_dom	Lumenal (Potential)
273	0	0	273	2.65e-08	1.85e-05	binding	Substrate (By similarity)
5	8	23.5	13	2.59e-07	0.00016541	domain	F-box
237	0	0	237	2.93e-07	0.00017266	turn
230	0	0	230	4.3e-07	0.00023565	np_bind	ATP (By similarity)
0	5	0	5	1.05e-06	0.00053578	mod_res	Tryptophan amide (Potential)
177	0	0	177	1.59e-05	0.00764536	binding	ATP (By similarity)
0	4	0	4	1.65e-05	0.00743231	mod_res	Phenylalanine amide (Potential)
179	0	0	179	1.68e-05	0.00715475	np_bind	GTP (By similarity)

## Sheet: E. Coli
Non-dark	Dark	Ratio	Total	Fisher’s p value	Adjusted p value	Annotation sub-category	Annotation
1086	0	0	1086	3.86e-51	5.16e-48	strand
819	0	0	819	2.52e-37	1.68e-34	helix
138	61	4.51	199	2.35e-19	1.05e-16	transmem	Helical; (Potential)
2	12	61.28	14	1.68e-11	5.61e-09	lipid	S-diacylglycerol cysteine (Potential)
2	12	61.28	14	1.68e-11	4.49e-09	lipid	N-palmitoyl cysteine (Potential
156	0	0	156	8.69e-07	0.00019356	turn
0	5	0	5	5.52e-06	0.0010528	mod_res	N-acetylalanine (By similarity)

## Sheet: Mouse
Non-dark	Dark	Ratio	Total	Fisher’s p value	Adjusted p value	Annotation sub-category	Annotation
6885	2027	5.89	8912	0	0	transmem	Helical; (Potential)
11702	0	0	11702	1.11e-254	3.76e-250	strand
9640	0	0	9640	6.49e-209	1.46e-204	helix
13003	61	0.09	13064	1.23e-195	2.07e-191	disulfid	By similarity
1629	349	4.28	1978	2.51e-99	3.39e-95	coiled	Potential
504	160	6.35	664	1.86e-65	2.1e-61	topo_dom	Lumenal (Potential)
2754	0	0	2754	3.53e-59	3.41e-55	turn
5785	578	1.99	6363	4.53e-49	3.83e-45	topo_dom	Cytoplasmic (Potential)
2	20	200.1	22	7.37e-25	5.54e-21	domain	MARVEL
7983	623	1.56	8606	8.29e-25	5.6e-21	mod_res	Phosphoserine (By similarity)
1020	0	0	1020	4.04e-22	2.48e-18	binding	Substrate (By similarity)
918	0	0	918	6.32e-20	3.56e-16	np_bind	ATP (By similarity)
3	16	106.73	19	5.8e-19	3.02e-15	zn_fing	DHHC-type
788	0	0	788	3.04e-17	1.47e-13	binding	ATP (By similarity)
769	0	0	769	1.02e-16	4.61e-13	act_site	Proton acceptor (By similarity)
694	0	0	694	3.19e-15	1.35e-11	np_bind	GTP (By similarity)
1964	187	1.91	2151	8.21e-15	3.27e-11	signal	Potential
622	0	0	622	1.04e-13	3.91e-10	disulfid
11279	399	0.71	11678	2.89e-13	1.03e-09	carbohyd	N-linked (GlcNAc...) (Potential)
4588	345	1.51	4933	2.81e-12	9.51e-09	topo_dom	Extracellular (Potential)

## Sheet: Human
Non-dark	Dark	Ratio	Total	Fisher’s p value	Adjusted p value	Annotation sub-category	Annotation
50327	0	0	50327	3.58e-140	5.65e-135	strand
46207	0	0	46207	6.54e-128	5.15e-123	helix
7572	217	4.75	7789	2.33e-76	1.22e-71	transmem	Helical; (Potential)
2023	81	6.64	2104	1.29e-38	5.1e-34	coiled	Potential
11972	0	0	11972	3.59e-32	1.13e-27	turn
12033	5	0.07	12038	4.92e-25	1.29e-20	disulfid	By similarity
0	8	0	8	1.65e-18	3.71e-14	domain	NBPF 3
0	8	0	8	1.65e-18	3.24e-14	domain	NBPF 1
0	8	0	8	1.65e-18	2.88e-14	domain	NBPF 2
152	19	20.73	171	1.84e-18	2.89e-14	compbias	Poly-Arg
3	9	497.59	12	2.13e-18	3.05e-14	motif	Nuclear export signal (Potential)
3	8	442.3	11	2.67e-16	3.51e-12	region	Fusion peptide (Potential)
0	7	0	7	2.75e-16	3.34e-12	domain	NBPF 4
0	7	0	7	2.75e-16	3.1e-12	domain	NBPF 5
1939	46	3.93	1985	2.92e-14	3.07e-10	signal	Potential
0	6	0	6	4.61e-14	4.54e-10	domain	NBPF 6
482	20	6.88	502	6.27e-11	5.81e-07	compbias	Poly-Glu
33	8	40.2	41	1.32e-10	1.16e-06	site	Cleavage (By similarity)
0	4	0	4	1.29e-09	1.07e-05	mutagen	C->S: No significant activity
3356	0	0	3356	3.16e-09	2.49e-05	disulfid
